# Supplementary material for: E96V Mutation in the Kdelr3 Gene Is Associated with Type 2 Diabetes Susceptibility in Obese NZO Mice
Source: MDPI journal article supplement (doi:10.3390/ijms24010845), 2023-01-03
Supplement: s1 [file s1]

# Supplemental Material

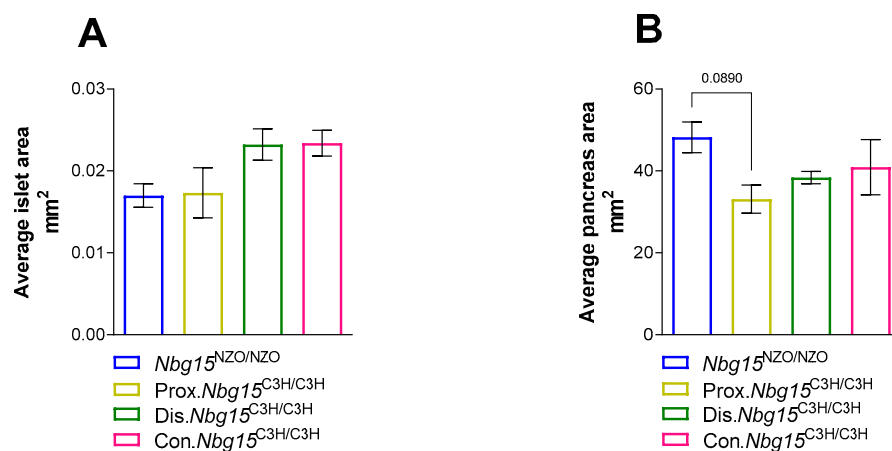

**Supplemental Figure S1.** Pancreata histological analysis of congenic strains for the *Nbg15* locus. Average islet area (A) and average pancreas area (B). Data are presented as mean  $\pm$  SEM and were analyzed by one ANOVA followed by Bonferroni post-hoc-test, \* $p < 0.05$ ; \*\* $p < 0.01$ ; \*\*\*\* $p < 0.0001$   $n=3-7$ .

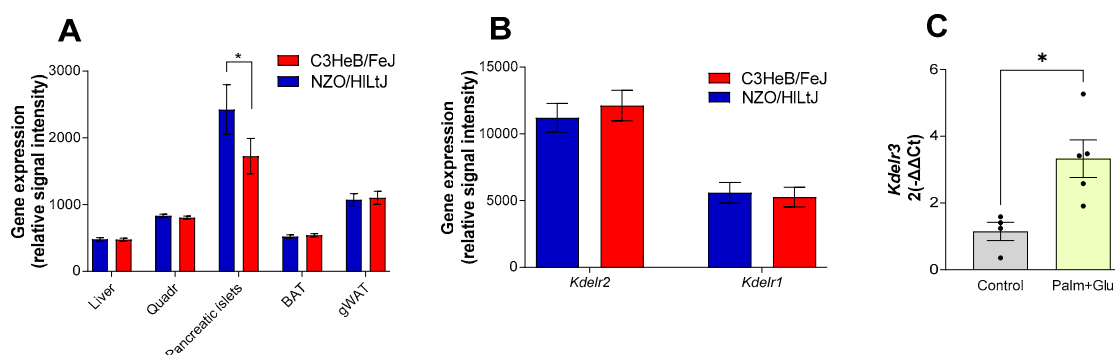

**Supplemental Figure S2.** Microarray gene expression profiling of *Kdelr3* in liver, muscle (quadriceps), pancreatic islets, brown adipose tissue (BAT) and gonadal adipose tissue (gWAT) in parental C3H and NZO mice (A). Expression levels of *Kdelr2* and *Kdelr1* in pancreatic islets of parental C3H and NZO mice (B). Quantitative real-time PCR of *Kdelr3* in NZO pancreatic islets treated with 500  $\mu\text{M}$  palmitate and 25 mM glucose for 24h (Palm+Glu) (C). Data are presented as mean  $\pm$  SEM and were analyzed by Students *t* test, \* $p < 0.05$ ; \*\* $p < 0.01$ ; \*\*\*\* $p < 0.0001$   $n=5-8$  (A, B),  $n=4-5$  (C).

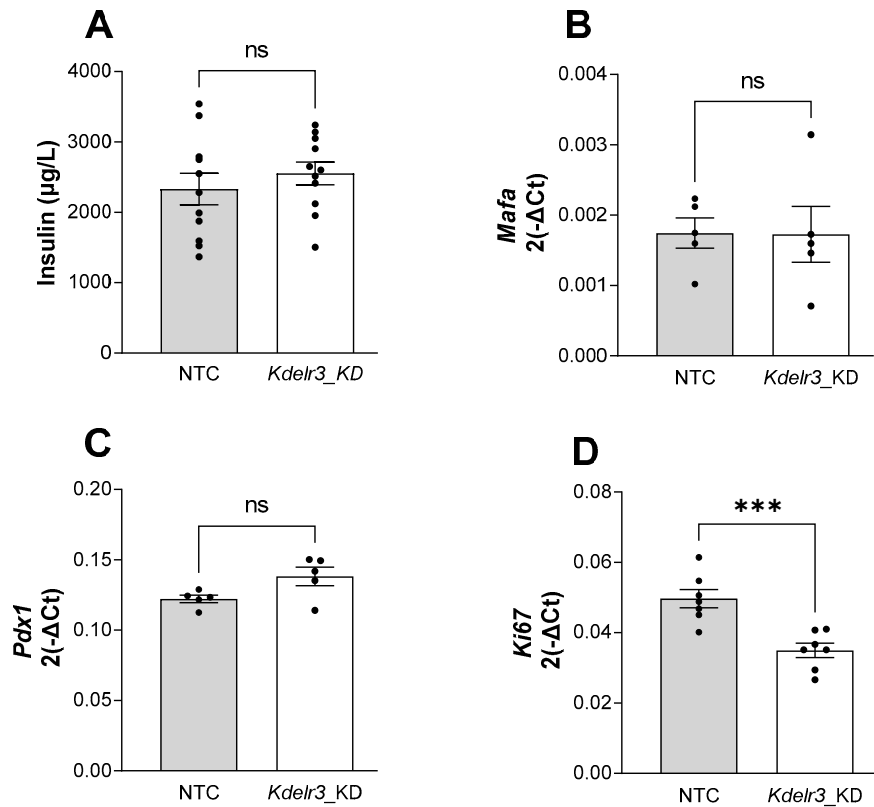

**Supplemental Figure S3.** Total insulin content in *Kdelr3*-KD MIN6 cells versus control (A), quantitative real-time PCR of *Mafa* (B), *Pdx1* (C) and *Ki67* (D) in *Kdelr3* knockdown MIN6 cells. *Kdelr3* knockdown cells were generated using a pool of siRNA. Data are presented as mean  $\pm$  SEM and were analyzed by Students *t* test, \**p* < 0.05; \*\**p* < 0.01; \*\*\**p* < 0.0001 n=5-10 independent experiments.

**Supplemental Table S1: List of phenotyping and statistical testing of blood glucose development of *Nbg15* recombinant mouse strains.**

The table indicates the mean, standard deviation and number of animals analysed. Statistical comparison used two-way ANOVA followed by Bonferroni post-hoc-test. The results reported by 95% confidence interval and adjusted P value refer to the comparison of the respective recombinant group (Prox.*Nbg15*<sup>C3H/C3H</sup>, Dis.*Nbg15*<sup>C3H/C3H</sup>, Con.*Nbg15*<sup>C3H/C3H</sup>) with the control group (*Nbg15*<sup>NZO/NZO</sup>).

| Blood glucose development |                          |      |    |                               |      |    |                 |                   |                              |      |    |                 |                   |                              |      |    |                 |                   |
|---------------------------|--------------------------|------|----|-------------------------------|------|----|-----------------|-------------------|------------------------------|------|----|-----------------|-------------------|------------------------------|------|----|-----------------|-------------------|
| Age (week s)              | Nbg15 <sup>NZO/NZO</sup> |      |    | Prox.Nbg15 <sup>C3H/C3H</sup> |      |    |                 |                   | Dis.Nbg15 <sup>C3H/C3H</sup> |      |    |                 |                   | Con.Nbg15 <sup>C3H/C3H</sup> |      |    |                 |                   |
|                           | Mea n                    | SD   | N  | Mea n                         | SD   | N  | 95% CI of diff. | Adjust ed P Value | Mea n                        | SD   | N  | 95% CI of diff. | Adjust ed P Value | Mea n                        | SD   | N  | 95% CI of diff. | Adjust ed P Value |
| 3                         | 156.1                    | 32.0 | 44 | 151.9                         | 46.8 | 35 | -65.21 to 56.65 | >0.9999           | 172.8                        | 27.9 | 35 | -44.27 to 77.59 | >0.9999           | 156.1                        | 23.8 | 34 | -61.45 to 61.41 | >0.9999           |
| 4                         | 216.0                    | 28.0 | 31 | 214.2                         | 33.5 | 20 | -80.73 to 64.62 | >0.9999           | 232.7                        | 30.0 | 15 | -63.89 to 92.31 | >0.9999           | 225.1                        | 27.1 | 22 | -72.13 to 70.29 | >0.9999           |
| 5                         | 220.3                    | 32.2 | 31 | 205.1                         | 23.9 | 20 | -94.13 to 51.23 | >0.9999           | 244.9                        | 32.5 | 15 | -55.98 to 100.2 | >0.9999           | 209.3                        | 43.9 | 22 | -92.24 to 50.18 | >0.9999           |
| 6                         | 238.4                    | 73.7 | 38 | 205.6                         | 40.7 | 25 | -101.2 to 33.15 | 0.6751            | 202.0                        | 60.8 | 24 | -105.5 to 30.06 | 0.547             | 204.3                        | 37.5 | 26 | -98.60 to 34.73 | 0.753             |

|    |       |       |    |       |       |    |                  |         |       |       |    |                  |         |       |       |    |                  |         |
|----|-------|-------|----|-------|-------|----|------------------|---------|-------|-------|----|------------------|---------|-------|-------|----|------------------|---------|
| 7  | 252.0 | 91.4  | 31 | 221.4 | 81.1  | 20 | -109.5 to 35.84  | 0.6736  | 248.1 | 36.0  | 15 | -84.52 to 71.68  | >0.9999 | 222.4 | 58.9  | 22 | -110.9 to 31.53  | 0.5455  |
| 8  | 277.6 | 114.8 | 31 | 255.4 | 110.0 | 20 | -101.1 to 44.29  | >0.9999 | 289.9 | 95.6  | 15 | -68.27 to 87.93  | >0.9999 | 240.0 | 77.1  | 22 | -118.9 to 23.52  | 0.3261  |
| 9  | 345.5 | 146.6 | 31 | 300.1 | 165.9 | 20 | -124.2 to 21.12  | 0.2678  | 296.8 | 78.8  | 15 | -129.3 to 26.93  | 0.3496  | 241.9 | 104.2 | 22 | -184.8 to -42.39 | 0.0004  |
| 10 | 368.0 | 139.1 | 44 | 319.5 | 139.8 | 35 | -109.4 to 12.42  | 0.1697  | 346.5 | 111.4 | 35 | -82.41 to 39.45  | >0.9999 | 255.4 | 112.8 | 34 | -174.1 to -51.21 | <0.0001 |
| 11 | 398.1 | 162.7 | 31 | 316.4 | 177.2 | 20 | -160.7 to -15.31 | 0.0113  | 328.9 | 116.4 | 15 | -149.8 to 6.385  | 0.0837  | 263.2 | 117.7 | 22 | -216.2 to -73.80 | <0.0001 |
| 12 | 417.8 | 170.9 | 31 | 312.7 | 161.4 | 20 | -184.1 to -38.72 | 0.0007  | 331.5 | 121.2 | 15 | -166.9 to -10.72 | 0.0195  | 264.2 | 117.2 | 22 | -234.9 to -92.46 | <0.0001 |
| 13 | 401.9 | 178.9 | 30 | 338.7 | 200.8 | 20 | -144.7 to 1.310  | 0.0562  | 342.2 | 145.0 | 15 | -142.9 to 13.95  | 0.1469  | 242.4 | 105.7 | 22 | -243.3 to -100.2 | <0.0001 |
| 14 | 393.7 | 184.0 | 29 | 338.3 | 187.6 | 20 | -140.9 to 5.754  | 0.082   | 256.9 | 141.6 | 15 | -224.0 to -66.55 | <0.0001 | 235.9 | 123.8 | 22 | -245.8 to -102.0 | <0.0001 |
| 15 | 361.8 | 187.0 | 32 | 307.9 | 201.3 | 24 | -135.5 to 3.138  | 0.0668  | 268.7 | 109.4 | 22 | -171.3 to -29.94 | 0.002   | 237.8 | 122.1 | 26 | -204.9 to -68.27 | <0.0001 |

**Supplemental Table S2.** List of phenotyping and statistical testing of body weight development of *Nbg15* recombinant mouse strains.

The table indicates the mean, standard deviation and number of animals analysed. Statistical comparison used two-way ANOVA followed by Bonferroni post-hoc-test. The results reported by 95% confidence interval and adjusted P value refer to the comparison of the respective recombinant group (Prox.*Nbg15*<sup>C3H/C3H</sup>, Dis.*Nbg15*<sup>C3H/C3H</sup>, Con.*Nbg15*<sup>C3H/C3H</sup>) with the control group (*Nbg15*<sup>NZO/NZO</sup>).

| Body Weight development |                          |     |    |                               |     |    |                    |                   |                              |     |    |                  |                              |      |     |    |                 |                   |
|-------------------------|--------------------------|-----|----|-------------------------------|-----|----|--------------------|-------------------|------------------------------|-----|----|------------------|------------------------------|------|-----|----|-----------------|-------------------|
|                         | Nbg15 <sup>NZO/NZO</sup> |     |    | Prox.Nbg15 <sup>C3H/C3H</sup> |     |    |                    |                   | Dis.Nbg15 <sup>C3H/C3H</sup> |     |    |                  | Con.Nbg15 <sup>C3H/C3H</sup> |      |     |    |                 |                   |
| Age (week s)            | Mea n                    | SD  | N  | Mea n                         | SD  | N  | 95% CI of diff.    | Adjust ed P Value | Mea n                        | SD  | N  | 95% CI of diff.  | Adjust ed P Value            | Mean | SD  | N  | 95% CI of diff. | Adjust ed P Value |
| 3                       | 13.2                     | 0.4 | 44 | 15.1                          | 0.6 | 35 | -0.3117 to 4.062   | 0.1201            | 14.7                         | 0.6 | 35 | -0.6889 to 3.685 | 0.3024                       | 14.0 | 0.3 | 34 | -1.380 to 3.029 | >0.9999           |
| 4                       | 22.3                     | 0.6 | 31 | 21.3                          | 1.0 | 20 | -3.160 to 2.050    | >0.9999           | 20.1                         | 0.9 | 15 | -5.213 to 0.3834 | 0.1163                       | 20.8 | 0.6 | 22 | -3.993 to 1.114 | 0.5304            |
| 5                       | 31.4                     | 0.6 | 31 | 29.4                          | 0.9 | 20 | -4.214 to 0.9965   | 0.4171            | 30.3                         | 0.8 | 15 | -4.152 to 1.445  | 0.7393                       | 30.4 | 0.5 | 22 | -3.586 to 1.521 | 0.9974            |
| 6                       | 38.0                     | 0.5 | 38 | 36.2                          | 0.5 | 25 | -3.738 to 1.079    | 0.5579            | 37.8                         | 0.8 | 24 | -2.589 to 2.275  | >0.9999                      | 36.8 | 0.5 | 26 | -3.514 to 1.269 | 0.7821            |
| 7                       | 42.8                     | 0.5 | 31 | 41.0                          | 0.5 | 20 | -4.062 to 1.148    | 0.5408            | 43.3                         | 0.6 | 15 | -2.575 to 3.021  | >0.9999                      | 42.2 | 0.7 | 22 | -3.139 to 1.967 | >0.9999           |
| 8                       | 47.4                     | 0.4 | 31 | 44.9                          | 0.5 | 20 | -4.629 to 0.5813   | 0.1884            | 49.1                         | 0.4 | 15 | -1.297 to 4.300  | 0.5961                       | 45.9 | 0.7 | 22 | -4.022 to 1.085 | 0.5045            |
| 9                       | 49.9                     | 0.4 | 31 | 47.8                          | 0.3 | 20 | -4.250 to 0.9602   | 0.391             | 51.8                         | 0.5 | 15 | -1.120 to 4.477  | 0.4523                       | 49.3 | 0.8 | 22 | -3.124 to 1.982 | >0.9999           |
| 10                      | 52.5                     | 0.5 | 44 | 50.2                          | 0.4 | 35 | -4.456 to -0.08225 | 0.039             | 54.7                         | 0.7 | 35 | 0.02069 to 4.395 | 0.047                        | 53.0 | 0.7 | 34 | -1.651 to 2.759 | >0.9999           |
| 11                      | 53.4                     | 0.7 | 31 | 50.0                          | 0.6 | 20 | -5.594 to -0.3835  | 0.0181            | 58.0                         | 0.6 | 15 | 1.528 to 7.125   | 0.0007                       | 54.4 | 1.1 | 22 | -1.527 to 3.580 | >0.9999           |

|    |      |     |    |      |     |    |                   |         |      |     |    |                |         |      |     |    |                 |         |
|----|------|-----|----|------|-----|----|-------------------|---------|------|-----|----|----------------|---------|------|-----|----|-----------------|---------|
| 12 | 54.4 | 0.8 | 31 | 51.3 | 0.8 | 20 | -5.374 to -0.1632 | 0.0329  | 60.2 | 0.7 | 15 | 2.725 to 8.322 | <0.0001 | 57.5 | 1.2 | 22 | 0.5909 to 5.697 | 0.0096  |
| 13 | 54.6 | 1.0 | 30 | 51.5 | 1.1 | 20 | -5.408 to -0.1739 | 0.0321  | 60.9 | 1.1 | 15 | 3.159 to 8.777 | <0.0001 | 58.3 | 1.2 | 22 | 1.031 to 6.160  | 0.0024  |
| 14 | 53.6 | 1.3 | 29 | 52.6 | 1.3 | 20 | -3.279 to 1.979   | >0.9999 | 60.3 | 1.1 | 15 | 3.625 to 9.266 | <0.0001 | 60.0 | 1.2 | 22 | 3.830 to 8.985  | <0.0001 |
| 15 | 54.6 | 1.2 | 32 | 53.0 | 1.3 | 24 | -3.525 to 1.445   | 0.948   | 62.5 | 1.5 | 22 | 5.588 to 10.66 | <0.0001 | 61.3 | 1.3 | 26 | 4.326 to 9.226  | <0.0001 |

**Supplemental Table S3.** List of *Nbg15* scored genes according to variant effect predictor analysis.

Genes carrying potential disruptive mutations were subjectively scored by the variant effect predictor analysis (VEP\_Ensembl) as “high” and “moderate”. Highly impacting genes were scored by the presence of stop lost/gain predicted mutations. Furthermore, polymorphisms scored with moderate impact were further ranked using the Sorting Intolerant From Tolerant tool (SIFT- Open source tool) that predicts the impact of amino acid substitution according to sequence homology of the given amino acid exchange. Highly disruptive mutations were scored when SIFT <0.05. Considering a percentage of false positive/negative errors, all genes ranked by SIFT within the range of 0.05-0.5 were further considered for analysis. \*gene not covered by microarray analysis in the analysed tissue. Sequence reference: **REL-1303 - GRCm38. SNP with low coverage (©).**

| Chr.15 position (Mbp) | Gene symbol        | dbSNP       | C3H.HeJ | NZO.HILtJ | Protein position | Amino acids | Codons  | IMPACT   | SIFT |
|-----------------------|--------------------|-------------|---------|-----------|------------------|-------------|---------|----------|------|
| 71.806                | <i>Col22a1*</i>    | rs46351738  | C       | T         | 1461             | K/E         | Aag/Gag | Moderate | 0.00 |
| 63.825                | <i>Gsdmc2</i>      | rs252605414 | C       | G         | 407              | L/V         | Ctc/Gtc | Moderate | 0.01 |
| 78.349                | <i>Csf2rb</i>      | rs4230845   | C       | A         | 742              | S/R         | Agt/Cgt | Moderate | 0.01 |
| 74.540                | <i>Adgrb1/Bai1</i> | rs51566550  | A       | G         | 379              | R/H         | cGc/cAc | Moderate | 0.01 |
| 76.705                | <i>Recql4</i>      | rs215408973 | G       | A         | 967              | A/V         | gCt/gTt | Moderate | 0.02 |
| 77.718                | <i>Apol7e*</i>     | rs107983511 | C       | -         | 220              | M/V         | Atg/Gtg | Moderate | 0.02 |
| 77.051                | <i>Apol6</i>       | rs261533897 | G       | C         | 122              | E/D         | gaG/gaC | Moderate | 0.04 |
| 79.919                | <i>Cbx7</i>        | rs36397331  | T       | C         | 153              | R/H         | cGc/cAc | Moderate | 0.05 |
| 52.040                | <i>Aard</i>        | rs31595794  | T       | A         | 103              | T/S         | Acg/Tcg | Moderate | 0.07 |
| 76.421                | <i>Mroh1</i>       | rs214800774 | G       | C         | 404              | D/H         | Gat/Cat | Moderate | 0.08 |
| 78.908                | <i>Sh3bp1</i>      | rs13463449  | T       | C         | 515              | P/L         | cCg/cTg | Moderate | 0.08 |
| 79.525                | <i>Kdelr3</i>      | rs256912165 | A       | T         | 96               | E/V         | gAg/gTg | Moderate | 0.08 |
| 77.389                | <i>Apol7a</i>      | rs229171902 | G       | A         | 272              | T/I         | aCc/aTc | Moderate | 0.10 |
| 78.961                | <i>Triobp</i>      | rs31569891  | A       | G         | 168              | T/A         | Act/Gct | Moderate | 0.10 |
| 78.938                | <i>Nol12</i>       | rs13466090  | T       | C         | 92               | A/V         | gCg/gTg | Moderate | 0.11 |
| 71.464                | <i>Fam135b</i>     | rs49135881  | C       | T         | 485              | V/I         | Gtc/Atc | Moderate | 0.17 |
| 75.896                | <i>Eef1d</i>       | rs227346636 | C       | A         | 155              | K/N         | aaG/aaT | Moderate | 0.18 |
| 57.936                | <i>Tbc1d31</i>     | rs265189026 | G       | C         | 247              | G/R         | Ggg/Cgg | Moderate | 0.22 |
| 79.828                | <i>Cbx6</i>        | rs227221465 | C       | G         | 309              | Q/H         | caG/caC | Moderate | 0.22 |
| 76.888                | <i>Zfp7</i>        | rs31575067  | T       | G         | 72               | E/D         | gaG/gaT | Moderate | 0.24 |
| 79.357                | <i>Maff</i>        | rs252068181 | T       | A         | 25               | S/T         | Tcg/Acg | Moderate | 0.25 |
| 76.596                | <i>Cpsf1*</i>      | rs248187700 | G       | A         | 1439             | L/F         | Ctc/Ttc | Moderate | 0.26 |
| 57.251                | <i>Slc22a22</i>    | rs31794878  | A       | T         | 344              | L/M         | Ttg/Atg | Moderate | 0.27 |
| 79.892                | <i>Apobec3</i>     | rs108537160 | A       | C         | 6                | L/M         | Ctg/Atg | Moderate | 0.27 |
| 77.481                | <i>Apol10a*</i>    | rs31475931  | ©       | C         | 7                | L/S         | tTa/tCa | Moderate | 0.34 |
| 66.542                | <i>Tmem71</i>      | rs256104481 | A       | T         | 214              | D/V         | gAt/gTt | Moderate | 0.35 |
| 58.874                | <i>Trmt12</i>      | rs36461259  | A       | G         | 342              | S/N         | aGc/aAc | Moderate | 0.36 |
| 76.870                | <i>Zfp251</i>      | rs47788016  | A       | G         | 78               | L/F         | Ctt/Ttt | Moderate | 0.38 |

|        |                |             |   |   |     |     |         |          |      |
|--------|----------------|-------------|---|---|-----|-----|---------|----------|------|
| 79.738 | <i>Sun2</i>    | rs232461033 | T | C | 165 | R/G | Agg/Ggg | Moderate | 0.38 |
| 75.712 | <i>Rhpn1</i>   | rs229443499 | G | A | 386 | V/I | Gtc/Atc | Moderate | 0.46 |
| 76.329 | <i>Exosc4</i>  | rs13465162  | T | C | 69  | */R | Tga/Cga | High     | —    |
| 79.637 | <i>Fam227a</i> | rs37552463  | A | G | 1   | M/T | aTg/aCg | High     | —    |
| 79.900 | <i>Apobec3</i> | rs46309510  | A | G | 11  | W/* | tgG/tgA | High     | —    |
| 79.934 | <i>Cbx7</i>    | rs47269926  | T | A | 24  | L/* | tTg/tAg | High     | —    |

**Supplemental Table S4.** Chemicals and buffers.

| Compound                              | Supplier                                                                                                                                                           |
|---------------------------------------|--------------------------------------------------------------------------------------------------------------------------------------------------------------------|
| <b><u>Anticoagulant cocktail:</u></b> |                                                                                                                                                                    |
| EDTA 0.5 M                            | Sigma Aldrich, Steinheim, Germany                                                                                                                                  |
| Aprotinin 0.15 M                      | Sigma Aldrich, Steinheim, Germany                                                                                                                                  |
| Heparin 10.000U/MI                    | Biochrom, Berlin, Germany                                                                                                                                          |
| Diprotin A                            | Bachem, Bubendorf, Switzerland                                                                                                                                     |
| Trizol                                | Qiagen, Crawley, U.K.                                                                                                                                              |
| Chloroform (pure)                     | AppliChem, Darmstadt, Germany                                                                                                                                      |
| Hexanucleotide primer                 | Roche, Mannheim, Germany                                                                                                                                           |
| Insulin Actrapid® HM Penfill®         | Novo Nordisk Pharma GmbH, Mainz, Germany                                                                                                                           |
| Isopropanol (≥ 99.5 %)                | AppliChem, Darmstadt, Germany                                                                                                                                      |
| QIAzol® reagent                       | QIAGEN, Hilden, Germany                                                                                                                                            |
| Sterile glucose 20 %                  | Braun (Melsungen, Germany)                                                                                                                                         |
| Microvette CB 300 µL Lithium-Heparin  | Sarstedt, Nümbrecht, Germany                                                                                                                                       |
| PCR-Plates (FrameStar® 384-Well)      | 4titude, Berlin, Germany                                                                                                                                           |
| Rotilabo microtest plates (96 well)   | Carl Roth, Karlsruhe, Germany                                                                                                                                      |
| Krebs-Ringer HEPES                    | 15 mM HEPES, 5 mM KCl, 120 mM NaCl, 24 mM NaHCO <sub>3</sub> , 1 mM MgCl <sub>2</sub> , 2 mM CaCl <sub>2</sub> , and 1 mg/ml BSA                                   |
| Lysis buffer                          | 20 mmol/L Tris-HCl, 150 mmol/L sodium chloride, 1 mmol/L EGTA, 1 mmol/L EDTA, 1%(v/v) Triton-X-100 and a proteinase inhibitor and a phosphatase inhibitor cocktail |

**Supplemental Table S5.** Genotyping primers for the recombinant congenic strains.

Mouse DNA was isolated from tail tips using the Invisorb® Genomic DNA Kit II (STRATEC Molecular GmbH, Berlin, Germany) according to manufacturer's instructions. For genotyping the PCR-based KASP (Kompetitive Allele-Specific PCR) method from LGC genomics (LGC group, Teddington, United Kingdom).

| Primer         | SNP ID    | Position (Mbp) | C3HeB/FeJ | NZO/HILtJ |
|----------------|-----------|----------------|-----------|-----------|
| 15-005994001-M | rs3715343 | 6.12           | C         | A         |
| 15-033125499-M | rs3720676 | 32.96          | G         | A         |
| 15-041919640-N | rs3090057 | 41.56          | C         | T         |
| 15-049283927-M | rs3719583 | 48.89          | A         | C         |
| 15-059192855-M | rs3653368 | 58.6           | G         | A         |
| 15-063976267-N | rs3023419 | 63.34          | T         | A         |
| 15-071973707-N | rs3088506 | 71.35          | G         | T         |
| 15-074947367-M | rs3724474 | 74.31          | T         | A         |
| 15-080641980-N | rs4230879 | 79.74          | A         | G         |
| 15-087100507-M | rs3690689 | 86.13          | G         | A         |
| 15-093195380-M | rs3707104 | 92.14          | T         | C         |
| 15-098621793-N | rs3023427 | 97.54          | T         | C         |
| 15-102788257-N | rs3023429 | 101.64         | T         | G         |

**Supplemental Table S6.** Sequence information of *Kdelr3* siRNA pool of oligonucleotides.

| Gene ID       | Target sequence       | Supplier                                                                                                      |
|---------------|-----------------------|---------------------------------------------------------------------------------------------------------------|
| <i>Kdelr3</i> | 1 GUAGUGUCUGGAGUUGUUC | Dharmacon (Lafayette, CO, USA),<br>#E-052192-00-0005, Accell Mouse<br><i>Kdelr3</i> (105785) siRNA SMART pool |
|               | 2 CUGAGGUGCUAAAUAGAAU |                                                                                                               |
|               | 3 GCACCAUCUUGGGAUAAAC |                                                                                                               |
|               | 4 CUAAGAACCACCAAUGUAG |                                                                                                               |

**Supplemental Table S7.** List of SYBR green primers for quantitative real-time PCR.

Primers were designed using primer designing tool from NCBI and synthesized by Eurogentec (Seraing, Belgium) and diluted at a final concentration of 10 nM. F: forward; R: reverse.

| Gene symbol    | Primer ID        | Primer sequence (5 →3')   |
|----------------|------------------|---------------------------|
| <i>Kdelr3</i>  | <i>Kdelr3_F</i>  | GGCGGGCGGGACCAT           |
|                | <i>Kdelr3_R</i>  | GAAAACCACCTTCATCACTGTGT   |
| <i>Kdelr1</i>  | <i>Kdelr1_F</i>  | TTGACCTCATCGCCATCGTT      |
|                | <i>Kdelr1_R</i>  | TTCCCCTTCAGGACTTTGGTG     |
| <i>Kdelr2</i>  | <i>Kdelr2_F</i>  | TGGTGTCTGCCAGACCATTC      |
|                | <i>Kdelr2_R</i>  | GCTTCTTCCCTTTGAGTACTTTTG  |
| <i>Ins2</i>    | <i>Ins2-F</i>    | CCCTGCTGGCCCTGCTCTT       |
|                | <i>Ins2-R</i>    | AGGTCTGAAGGTCACCTGCT      |
| <i>Cbx6</i>    | <i>Cbx6_F</i>    | GCCGAATCCATCATTAACG       |
|                | <i>Cbx6_R</i>    | TTGGGTTTAGGTCCCCTCTT      |
| <i>Fam135b</i> | <i>Fam135b_F</i> | TAGAGACCTGAGACAGCTCG      |
|                | <i>Fam135b_R</i> | TGATCTTTTTGGTTCATTACCTGTC |
| <i>Znt8</i>    | <i>Znt8_F</i>    | TGCCAAGTGGAGACTCTGTG      |
|                | <i>Znt8_R</i>    | CTGCTCGATACCAACCAAAT      |
| <i>Pcsk1</i>   | <i>Pcsk1_F</i>   | TCTGGTTGTCTGGACCTCTGAGT   |
|                | <i>Pcsk1_R</i>   | CATCAAGCCTGCCCCATTCTTT    |
| <i>Pcsk2</i>   | <i>Pcsk2_F</i>   | TCTGACTGTGCTCACCTCCAA     |
|                | <i>Pcsk2_R</i>   | AGGACTCCGTAGCCAAAGAGG     |
| <i>Chop</i>    | <i>Chop_F</i>    | CCACCACACCTGAAAGCAGAA     |
|                | <i>Chop_R</i>    | AGGTGAAAGGCAGGGACTCA      |
| <i>Atf3</i>    | <i>Atf3_F</i>    | CTCTGCGCTGGAGTCAGTT       |
|                | <i>Atf3_R</i>    | GCCTCCTTTTCCTCTCAT        |
